# Supplementary material for: Control of cytokine mRNA degradation by the histone deacetylase inhibitor ITF2357 in rheumatoid arthritis fibroblast-like synoviocytes: beyond transcriptional regulation
Source: Springer Nature journal article supplement (doi:10.1186/s13075-018-1638-4), 2018-07-20
Supplement: MOESM1 [file 15966678]

**Figure S1**

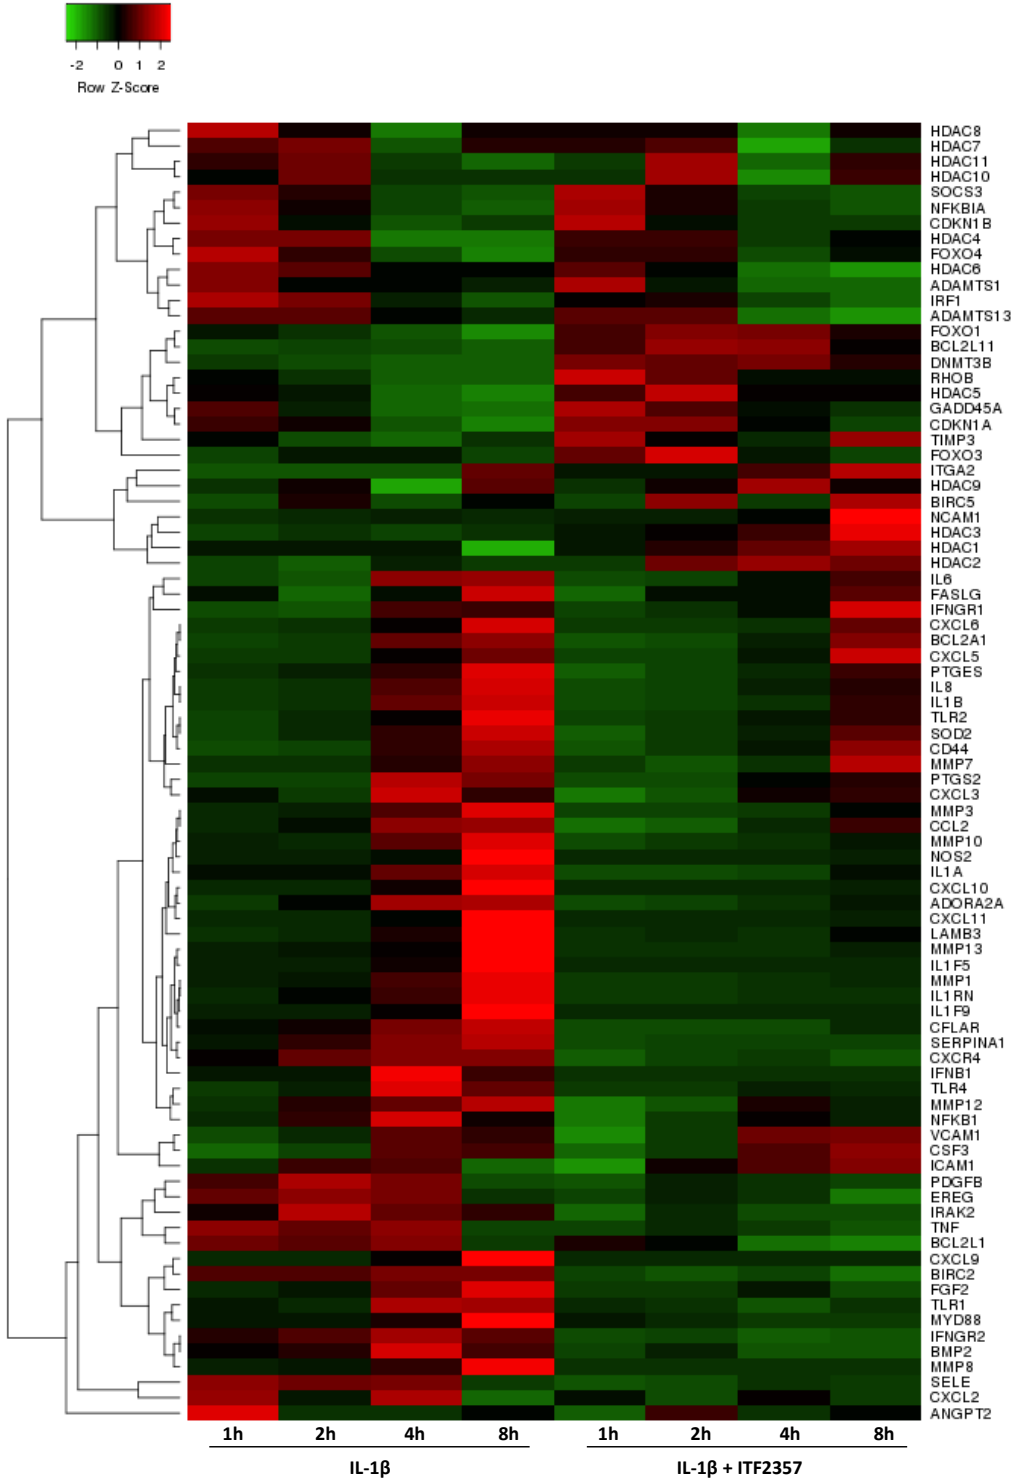

**Figure S1.** Kinetics of mRNA regulation by ITF2357. RA FLS were either left untreated or were treated with ITF2357 prior to incubation with IL-1 $\beta$  for the indicated time. Temporal changes in mRNA accumulation of IL-1 $\beta$ -inducible genes were monitored using a customized qPCR array. Data are presented as Z-scores of mean (n=3) fold changes relative to unstimulated cells and hierarchically clustered with the average linkage method.
