# Supplementary material for: Control of cytokine mRNA degradation by the histone deacetylase inhibitor ITF2357 in rheumatoid arthritis fibroblast-like synoviocytes: beyond transcriptional regulation
Source: Springer Nature journal article supplement (doi:10.1186/s13075-018-1638-4), 2018-07-20
Supplement: MOESM3 [file 15966678]

**Figure S3**

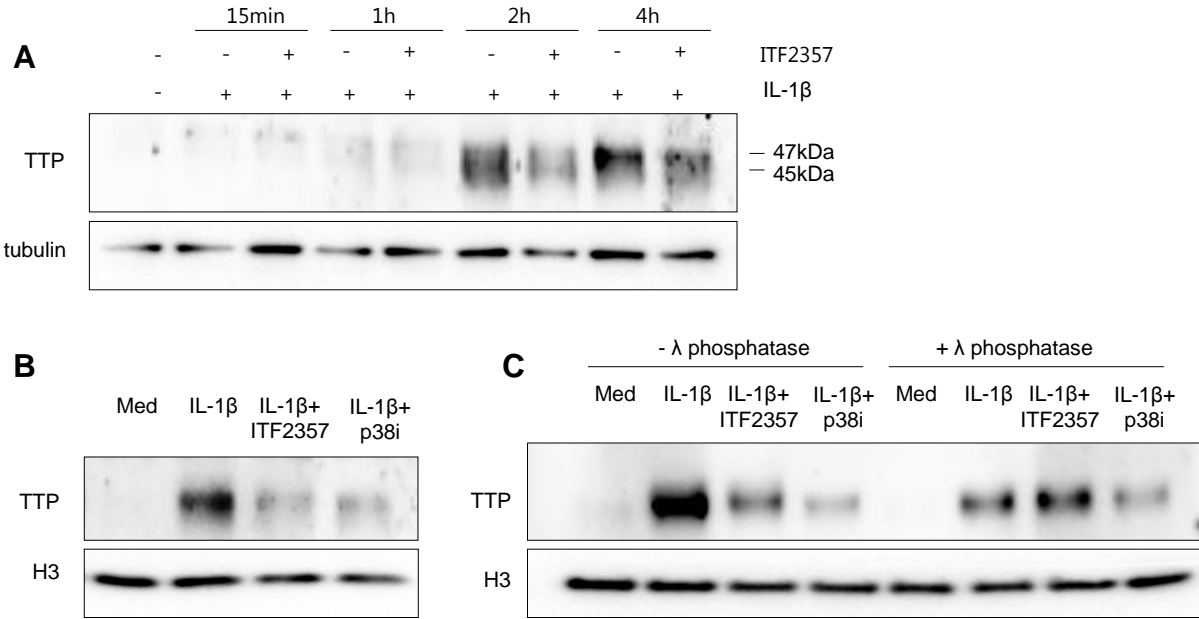

**Figure S3.** TTP post-translational changes after ITF2357 treatment. (A) FLS (n=2) were left untreated or were treated with ITF2357 prior to incubation with IL-1 $\beta$  for 15min, 1h, 2h and 4h. Protein lysates were immunoblotted with antibodies recognizing TTP and tubulin. Proteins detected at 45 and 47kDa correspond to TTP protein, and to its post-translationally modified counterpart, respectively. (B) FLS (n=2) were left untreated or were treated with either ITF2357 or p38 inhibitor (p38i, SB202190) prior to incubation with IL-1 $\beta$  for 4h, and immunoblotted for TTP and H3.(C) FLS (n=1) were treated as in (B) and protein lysate incubated either with or without  $\lambda$  phosphatase, displaying activity towards phosphorylated serine, threonine and tyrosine residues. Samples were immunoblotted as in (B).
