# Supplementary material for: Control of cytokine mRNA degradation by the histone deacetylase inhibitor ITF2357 in rheumatoid arthritis fibroblast-like synoviocytes: beyond transcriptional regulation
Source: Springer Nature journal article supplement (doi:10.1186/s13075-018-1638-4), 2018-07-20
Supplement: MOESM4 [file 15966678]

**Table S1. Sequences of human primers used for qPCR analysis.**

| Gene     | Forward primer          | Reverse primer           |
|----------|-------------------------|--------------------------|
| GAPDH    | GCCAGCCGAGCCACATC       | TGACCAGGCGCCAATAC        |
| IL6      | GACAGCCACTCACCTCTTCA    | CCTCTTTGCTGCTTTCACAC     |
| PT IL6   | ACATCCTCGACGGCATCTCAG   | CCCAGCAAAGACCTCCTAATG    |
| IL8      | GCTCTGTGTGAAGGTGCAGT    | CCAGACAGAGCTCTCTTCCA     |
| PT IL8   | ATTGAGAGTGGACCACACTG    | ACTACTGTAATCCTAACACCTG   |
| CXCL2    | GAAAGCTTGTCTCAACCCCG    | AGTTGGATTGCCATTTTCAGC    |
| PTGS2    | ACTGCTCAACACCCGAATTT    | TGCATTTGGAAGGAAGGGAA     |
| PT PTGS2 | GGTGCCACTTTCACATTTT     | AGGCTTCCCAGCTTTTGTAG     |
| MMP1     | CGGGGCTTTGATGTACCCTA    | CGATGGGCTGGACAGGATTT     |
| PT MMP1  | GGCCACAAAGTTGATGCAGT    | TTGCTACGGCAATGAAATGGAG   |
| MMP3     | GAGGACACCAGCATGAACCT    | CACCTCCAGAGTGTCCGGAGT    |
| ADAMTS1  | GTCTACCAAAGGACAGGTG     | GTACCATCTACAACCTTGGGC    |
| FOXO1    | TCTTCTCCTGAGTCTGGGTAATT | CAGAGAGCTACCAAGGATTCATGA |
| AUF1     | TTTGTTGGTGGCCTTTCTCC    | ATTCCACCTCACAAAACCAC     |
| BRF1     | ATGCAAGGGTAACAAGATGCTC  | CACTGCCTTTCTGTCCAGC      |
| BRF2     | TCCAGAAACATGTCGACCAC    | AGGGATTTCTCTGTCTTGCAC    |
| KSRP     | CTTACAAAGTGCAGCAAGCC    | AGATCCGTACTCATTCCGGT     |
| HuR      | AAGCCTGTTTCAGCAGCATTG   | CCAAGCTGTGTCCTGCTACT     |
| TTP      | CTGCCATCTACGAGAGCCT     | ACTCAGTCCCTCCATGGTC      |
| PT TTP   | GCCATCTACGAGGTGAGTCC    | AGTTTGCGGCGCTAGAGAG      |

**Table S2. Sequences of murine primers used for qPCR analysis.**

| Gene  | Forward primer           | Reverse primer       |
|-------|--------------------------|----------------------|
| IL6   | CAGTCAGGCAACAAAGATGGG    | AACTTCCCTCACCTTAGCAG |
| CXCL2 | TCCAGAGCTTGAGTGTGACG     | GCAAACCTTTTGAACGCCCT |
| PTGS2 | ACTTACAGGAGAGAAGGAAATGGC | AGGTTTTTCCACCAGCAGGG |
| ACTB  | TTCTTTCAGCTCCTTCGTT      | CGATGGAGGGGAATACAGC  |
