# Supplementary material for: Control of cytokine mRNA degradation by the histone deacetylase inhibitor ITF2357 in rheumatoid arthritis fibroblast-like synoviocytes: beyond transcriptional regulation
Source: Arthritis Res Ther. 2018 Jul 20;20:148. doi: 10.1186/s13075-018-1638-4 (PMC6053802; doi:10.1186/s13075-018-1638-4)
Supplement: Supplementary file 2 — Figure S2. Effects of ITF2357 on mRNA stability. (PDF 816 kb) [file 13075_2018_1638_MOESM2_ESM.pdf]

# Figure S2

A

| Gene target | IL-1 $\beta$<br>ActD 2h | SEM  | IL-1 $\beta$<br>+ITF2357<br>ActD 2h | SEM | IL-1 $\beta$<br>ActD 5h | SEM  | IL-1 $\beta$<br>+ITF2357<br>ActD 5h | SEM |
|-------------|-------------------------|------|-------------------------------------|-----|-------------------------|------|-------------------------------------|-----|
| ADAMTS1     | 48%                     | 6%   | 32%                                 | 4%  | 30%                     | 4%   | 18%                                 | 3%  |
| ADAMTS13    | 86%                     | 10%  | 76%                                 | 6%  | 76%                     | 6%   | 76%                                 | 8%  |
| ADORA2A     | 98%                     | 5%   | 91%                                 | 6%  | 88%                     | 6%   | 79%                                 | 7%  |
| ANGPT2      | 135%                    | 5%   | 130%                                | 24% | 124%                    | 20%  | 99%                                 | 17% |
| BCL2A1      | 103%                    | 5%   | 101%                                | 10% | 94%                     | 4%   | 88%                                 | 9%  |
| BCL2L1      | 84%                     | 4%   | 67%                                 | 4%  | 44%                     | 7%   | 29%                                 | 5%  |
| BCL2L11     | 29%                     | 6%   | 19%                                 | 2%  | 15%                     | 2%   | 12%                                 | 1%  |
| BIRC2       | 81%                     | 2%   | 67%                                 | 5%  | 53%                     | 4%   | 39%                                 | 1%  |
| BIRC5       | 89%                     | 13%  | 84%                                 | 3%  | 87%                     | 13%  | 79%                                 | 5%  |
| BMP2        | 68%                     | 2%   | 59%                                 | 4%  | 34%                     | 6%   | 22%                                 | 3%  |
| CCL2        | 78%                     | 9%   | 70%                                 | 12% | 75%                     | 8%   | 59%                                 | 14% |
| CD44        | 104%                    | 2%   | 99%                                 | 3%  | 100%                    | 3%   | 99%                                 | 4%  |
| CDKN1A      | 69%                     | 5%   | 68%                                 | 5%  | 53%                     | 6%   | 45%                                 | 5%  |
| CDKN1B      | 15%                     | 4%   | 8%                                  | 3%  | 5%                      | 1%   | 3%                                  | 0%  |
| CFLAR       | 101%                    | 4%   | 88%                                 | 5%  | 82%                     | 11%  | 69%                                 | 6%  |
| CSF3        | 67%                     | 10%  | 61%                                 | 21% | 68%                     | 15%  | 55%                                 | 20% |
| CXCL10      | 95%                     | 10%  | 94%                                 | 6%  | 87%                     | 5%   | 86%                                 | 6%  |
| CXCL11      | 110%                    | 11%  | 116%                                | 41% | 89%                     | 12%  | 98%                                 | 38% |
| CXCL2       | 28%                     | 12%  | 9%                                  | 4%  | 21%                     | 12%  | 5%                                  | 3%  |
| CXCL3       | 81%                     | 6%   | 64%                                 | 9%  | 81%                     | 9%   | 67%                                 | 16% |
| CXCL5       | 101%                    | 12%  | 105%                                | 8%  | 101%                    | 18%  | 108%                                | 11% |
| CXCL6       | 107%                    | 4%   | 99%                                 | 2%  | 102%                    | 6%   | 108%                                | 6%  |
| CXCL9       | 278%                    | 207% | 106%                                | 48% | 302%                    | 256% | 110%                                | 54% |
| CXCR4       | 59%                     | 9%   | 69%                                 | 10% | 26%                     | 8%   | 25%                                 | 5%  |
| DNMT3B      | 66%                     | 8%   | 40%                                 | 3%  | 51%                     | 8%   | 33%                                 | 6%  |
| EREG        | 95%                     | 7%   | 86%                                 | 5%  | 81%                     | 6%   | 81%                                 | 9%  |
| FASLG       | 84%                     | 10%  | 95%                                 | 5%  | 92%                     | 12%  | 98%                                 | 5%  |
| FGF2        | 89%                     | 2%   | 85%                                 | 6%  | 75%                     | 5%   | 71%                                 | 7%  |
| FOXO1       | 36%                     | 9%   | 38%                                 | 7%  | 9%                      | 2%   | 6%                                  | 1%  |
| FOXO3       | 75%                     | 3%   | 72%                                 | 4%  | 40%                     | 3%   | 34%                                 | 3%  |
| FOXO4       | 82%                     | 6%   | 92%                                 | 4%  | 74%                     | 5%   | 76%                                 | 6%  |
| GADD45A     | 36%                     | 3%   | 25%                                 | 5%  | 19%                     | 2%   | 9%                                  | 2%  |
| HDAC1       | 96%                     | 3%   | 100%                                | 3%  | 97%                     | 6%   | 102%                                | 5%  |
| HDAC10      | 90%                     | 8%   | 77%                                 | 10% | 78%                     | 8%   | 74%                                 | 10% |
| HDAC11      | 94%                     | 10%  | 98%                                 | 5%  | 85%                     | 9%   | 92%                                 | 5%  |
| HDAC2       | 82%                     | 12%  | 68%                                 | 6%  | 71%                     | 13%  | 65%                                 | 7%  |
| HDAC3       | 94%                     | 5%   | 89%                                 | 5%  | 91%                     | 6%   | 86%                                 | 3%  |
| HDAC4       | 81%                     | 6%   | 83%                                 | 2%  | 63%                     | 6%   | 61%                                 | 3%  |
| HDAC5       | 81%                     | 7%   | 66%                                 | 3%  | 73%                     | 7%   | 58%                                 | 6%  |
| HDAC6       | 88%                     | 3%   | 88%                                 | 6%  | 79%                     | 5%   | 73%                                 | 7%  |
| HDAC7       | 73%                     | 8%   | 63%                                 | 5%  | 51%                     | 7%   | 41%                                 | 7%  |
| HDAC8       | 92%                     | 2%   | 90%                                 | 3%  | 85%                     | 5%   | 73%                                 | 3%  |
| HDAC9       | 101%                    | 7%   | 89%                                 | 4%  | 70%                     | 10%  | 74%                                 | 7%  |
| ICAM1       | 90%                     | 2%   | 91%                                 | 5%  | 82%                     | 5%   | 76%                                 | 5%  |
| IFNB1       | 97%                     | 15%  | 84%                                 | 18% | 66%                     | 11%  | 56%                                 | 19% |
| IFNGR1      | 91%                     | 12%  | 81%                                 | 11% | 69%                     | 5%   | 64%                                 | 7%  |
| IFNGR2      | 111%                    | 10%  | 93%                                 | 12% | 99%                     | 11%  | 99%                                 | 9%  |
| IL1A        | 78%                     | 13%  | 64%                                 | 7%  | 56%                     | 15%  | 44%                                 | 13% |
| IL1B        | 81%                     | 12%  | 73%                                 | 15% | 80%                     | 19%  | 77%                                 | 26% |
| IL1F5       | 91%                     | 6%   | 73%                                 | 12% | 74%                     | 1%   | 77%                                 | 8%  |
| IL1F9       | 69%                     | 11%  | 132%                                | 76% | 43%                     | 15%  | 77%                                 | 19% |
| IL1RN       | 88%                     | 5%   | 122%                                | 26% | 95%                     | 14%  | 72%                                 | 18% |
| IL6         | 56%                     | 15%  | 31%                                 | 14% | 51%                     | 17%  | 26%                                 | 14% |
| IL8         | 70%                     | 9%   | 53%                                 | 15% | 71%                     | 8%   | 49%                                 | 16% |
| IRAK2       | 57%                     | 10%  | 46%                                 | 10% | 27%                     | 9%   | 16%                                 | 5%  |
| IRF1        | 17%                     | 4%   | 15%                                 | 4%  | 4%                      | 1%   | 3%                                  | 0%  |
| ITGA2       | 73%                     | 6%   | 69%                                 | 13% | 61%                     | 6%   | 83%                                 | 12% |
| LAMB3       | 94%                     | 2%   | 92%                                 | 6%  | 83%                     | 7%   | 89%                                 | 4%  |
| MMP1        | 96%                     | 5%   | 103%                                | 9%  | 88%                     | 7%   | 105%                                | 9%  |
| MMP10       | 116%                    | 15%  | 107%                                | 7%  | 108%                    | 17%  | 102%                                | 5%  |
| MMP13       | 141%                    | 49%  | 107%                                | 45% | 99%                     | 40%  | 105%                                | 28% |
| MMP3        | 100%                    | 3%   | 95%                                 | 2%  | 97%                     | 2%   | 104%                                | 3%  |
| MMP7        | 84%                     | 10%  | 114%                                | 7%  | 83%                     | 4%   | 103%                                | 6%  |
| MMP8        | 254%                    | 200% | 106%                                | 40% | 288%                    | 217% | 115%                                | 74% |
| PTGES       | 102%                    | 3%   | 101%                                | 2%  | 107%                    | 6%   | 102%                                | 5%  |

|          |      |     |      |     |      |     |      |     |
|----------|------|-----|------|-----|------|-----|------|-----|
| MYD88    | 94%  | 5%  | 88%  | 4%  | 78%  | 7%  | 70%  | 4%  |
| NCAM1    | 87%  | 7%  | 130% | 35% | 73%  | 9%  | 116% | 41% |
| NFKB1    | 98%  | 2%  | 93%  | 4%  | 72%  | 4%  | 58%  | 7%  |
| NFKBIA   | 2%   | 0%  | 1%   | 0%  | 1%   | 0%  | 0%   | 0%  |
| NOS2     | 85%  | 8%  | 82%  | 13% | 72%  | 6%  | 57%  | 17% |
| PDGFB    | 74%  | 10% | 47%  | 12% | 23%  | 8%  | 12%  | 4%  |
| PTGS2    | 75%  | 13% | 41%  | 13% | 68%  | 16% | 44%  | 19% |
| RHOB     | 23%  | 3%  | 20%  | 2%  | 3%   | 1%  | 1%   | 0%  |
| SELE     | 65%  | 11% | 44%  | 10% | 46%  | 9%  | 36%  | 8%  |
| SERPINA1 | 100% | 5%  | 102% | 4%  | 102% | 10% | 105% | 7%  |
| SOCS3    | 7%   | 1%  | 4%   | 0%  | 2%   | 0%  | 2%   | 0%  |
| SOD2     | 100% | 4%  | 97%  | 4%  | 98%  | 2%  | 93%  | 2%  |
| TIMP3    | 131% | 83% | 21%  | 10% | 73%  | 20% | 36%  | 18% |
| TLR1     | 73%  | 5%  | 80%  | 6%  | 53%  | 6%  | 61%  | 9%  |
| TLR2     | 111% | 10% | 102% | 15% | 98%  | 11% | 89%  | 13% |
| TLR4     | 86%  | 5%  | 76%  | 3%  | 71%  | 5%  | 52%  | 3%  |
| TNF      | 23%  | 13% | 8%   | 3%  | 12%  | 9%  | 3%   | 1%  |
| VCAM1    | 101% | 3%  | 99%  | 5%  | 95%  | 6%  | 94%  | 8%  |
| B2M      | 106% | 5%  | 100% | 1%  | 109% | 3%  | 104% | 3%  |
| HPRT1    | 102% | 2%  | 106% | 4%  | 97%  | 4%  | 106% | 2%  |
| RPL13A   | 96%  | 1%  | 94%  | 2%  | 92%  | 2%  | 92%  | 2%  |
| GAPDH    | 97%  | 3%  | 100% | 7%  | 103% | 6%  | 99%  | 3%  |
| ACTB     | 100% | 3%  | 101% | 3%  | 101% | 2%  | 100% | 4%  |

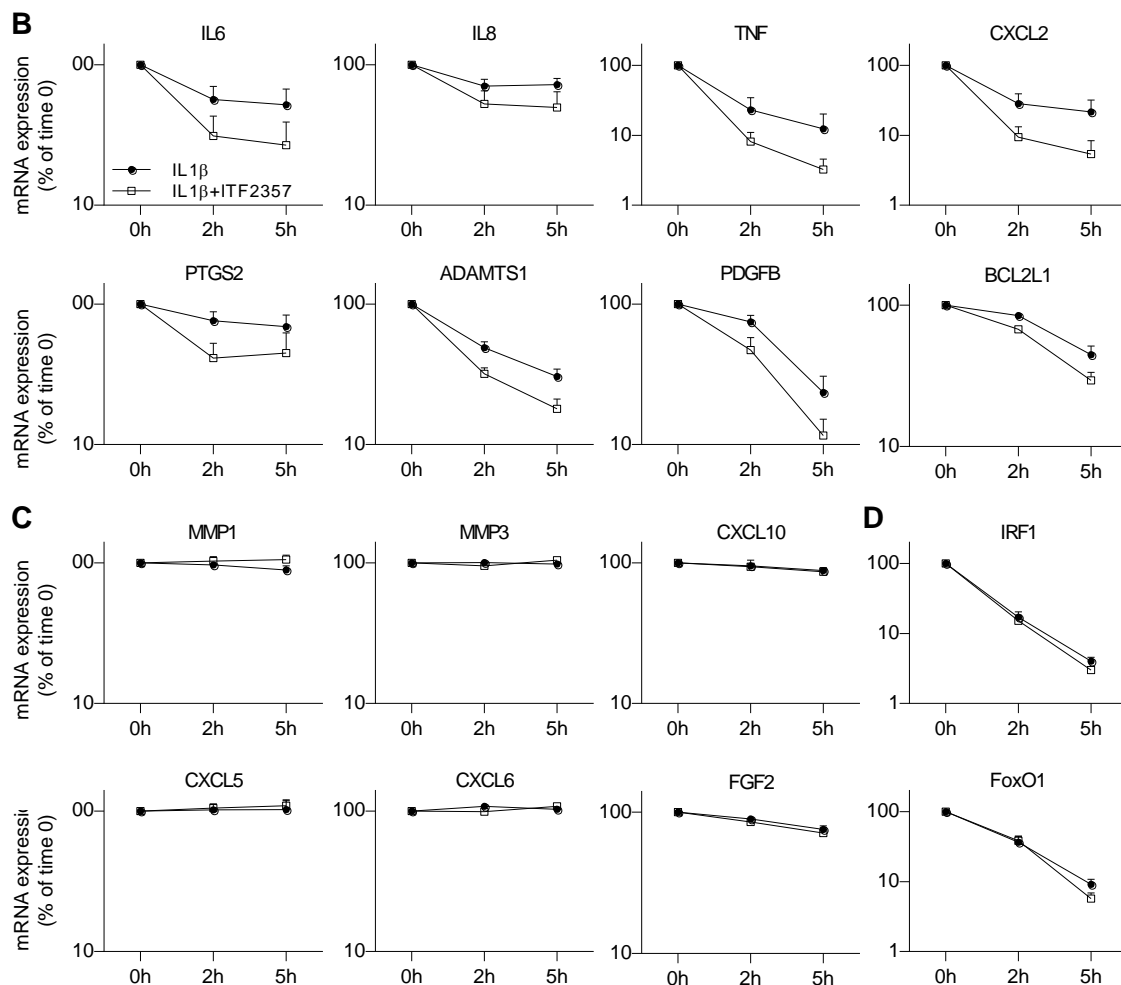

**Figure S2.** Effects of ITF2357 on mRNA stability. (A-B) RA FLS (n=4) were left untreated or were treated with ITF2357 prior to incubation with IL-1 $\beta$  for 2h. Transcription was then blocked with 10 $\mu$ g/ml of actinomycin D (ActD) and RNA extracted at the indicated time points from the start of ActD treatment. mRNA degradation in the presence or absence of ITF2357 was monitored using customized qPCR arrays. mRNA expression values for 0h time point were normalized to 100%. (A) Mean percentage  $\pm$  SEM of remaining mRNA after 2h and 5h ActD treatment, calculated relative to 100% value of relative controls from 0h ActD treatment. (B-C-D) RA FLS (n=4) were treated as in A. Representative genes displaying enhanced mRNA degradation by ITF2357 (B), no appreciable decay regardless of IL-1 $\beta$  stimulation (C), or no destabilization by ITF2357 (D).
